# Supplementary material for: Volatile Compounds Emitted by Pseudomonas aeruginosa Stimulate Growth of the Fungal Pathogen Aspergillus fumigatus
Source: PubMed Central journal article supplement (PMC4807360; doi:10.1128/mbio.00219-16), 2016-03-15
Supplement: mbo002162728sf1.pdf [file mbo002162728sf1.pdf]

SI Figure 1

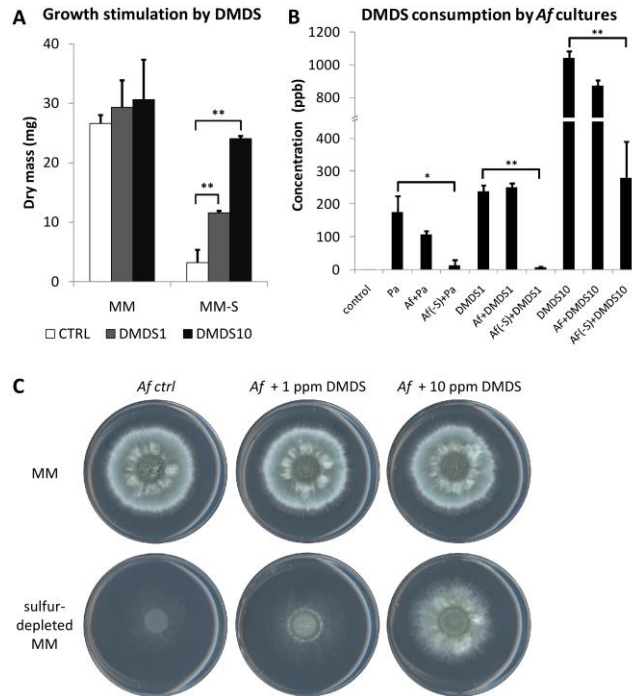

**SI Figure 1: Effect of DMDS on the growth of *Af*.** (A) DMDS at 1 or 10 ppm concentration stimulates the growth of *Af* on sulfur-depleted medium (MM-S) but not on sulfur replete medium (MM). (B) Residual concentration of DMDS in the culture headspace of the double plate setup. DMDS produced by *Pa* (grown on MM) or the pure compound (1 and 10 ppm) is not significantly taken up by the fungus when grown on MM (*Af*), but is consumed on sulfur-deficient MM (*Af*(-S)). (C) Growth of *Af* in the presence of DMDS in the culture headspace. Growth is not affected on MM, whereas growth is increased on sulfur-depleted MM in a dose-dependent manner, as observed for DMS (Fig. 2D). All error bars show the values' S.E.M.; \*  $p \leq 0.05$ ; \*\*  $p \leq 0.01$ .
