# Supplementary material for: Volatile Compounds Emitted by Pseudomonas aeruginosa Stimulate Growth of the Fungal Pathogen Aspergillus fumigatus
Source: PubMed Central journal article supplement (PMC4807360; doi:10.1128/mbio.00219-16), 2016-03-15
Supplement: mbo002162728sf2.pdf [file mbo002162728sf2.pdf]

## SI Figure 2

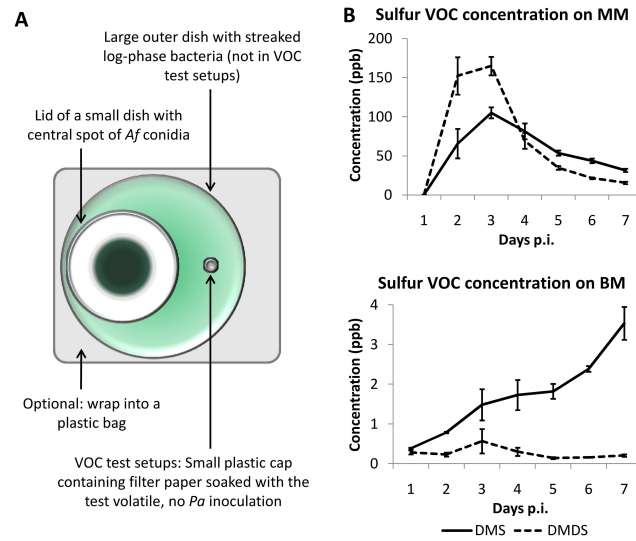

**SI Figure 2:** (A) Schematic of the test setup used in this work. (B) Determination of concentrations of DMS and DMDS produced by *Pa* in minimal medium (MM) and Brian's broth (BM). Days p.i.: days post inoculation. Error bars show the values' S.E.M.
